# Supplementary material
Source: PubMed Central journal article supplement (PMC3647152)
Supplement: mmc1.pdf [file mmc1.pdf]

# Structural Ensemble and Dynamics of Toroidal-like DNA Shapes in Bacteriophage $\phi$ 29 Exit Cavity

Andrew D. Hirsh,<sup>¶</sup> Maryna Taranova,<sup>†</sup> Troy A. Lionberger,<sup>‡</sup> Todd D. Lillian,<sup>§</sup> Ioan Andricioaei,<sup>†</sup> and N. C. Perkins<sup>¶</sup>

<sup>†</sup>Chemistry, University of California at Irvine, Irvine, California; <sup>‡</sup>Physics, University of California at Berkeley, Berkeley, California; <sup>§</sup>Mechanical Engineering, Texas Tech University, Lubbock, Texas; and <sup>¶</sup>Mechanical Engineering, University of Michigan, Ann Arbor, Michigan

**ABSTRACT** In the bacteriophage  $\phi$ 29, DNA is packed into a preassembled capsid from which it ejects under high pressure. A recent cryo-EM reconstruction of  $\phi$ 29 revealed a compact toroidal DNA structure (30–40 basepairs) lodged within the exit cavity formed by the connector-lower collar protein complex. Using multiscale models, we compute a detailed structural ensemble of intriguing DNA toroids of various lengths, all highly compatible with experimental observations. In particular, coarse-grained (elastic rod) and atomistic (molecular dynamics) models predict the formation of DNA toroids under significant compression, a largely unexplored state of DNA. Model predictions confirm that a biologically attainable compressive force of 25 pN sustains the toroid and yields DNA electron density maps highly consistent with the experimental reconstruction. The subsequent simulation of dynamic toroid ejection reveals large reactions on the connector that may signal genome release.

## INTRODUCTION

Double-stranded DNA (dsDNA) bacteriophages are sophisticated biological machines that pack their micron-length genome into a preassembled capsid only tens of nanometers wide (1). The well-studied bacteriophage  $\phi$ 29 is one of the smallest dsDNA bacteriophages and it has long served as a model system to study virus structure, assembly, and ejection. Its relatively small genome consists of  $\sim$ 19.3 kilo-basepairs (kbp), which encode for only  $\sim$ 20 genes. Despite this small genome, the DNA is packed to near-crystalline density within the confines of the capsid by one of the most powerful ATP-driven molecular motors (2). These remarkable viral DNA packing motors overcome considerable energetic barriers (due to DNA bending/twisting, electrostatic self-repulsion, and entropy) by generating forces at  $\sim$ 100 pN (2–5).

At the heart of the packing motor is the  $\phi$ 29 connector, a 12-mer ring of gene product 10 (gp10) proteins, which acts as a portal through which DNA is threaded. The connector actively participates in almost every stage of the phage life-cycle. Bacteriophage  $\phi$ 29, unlike many other tailed DNA bacteriophages, packages a unit-length genome with a terminal protein (gp3) covalently linked to the 5' ends of the genome. After packing the DNA-gp3 complex, the motor assembly is broken down by dissociation of the ATPase (gp16) and pRNA. The connector is then left available as the binding site for the tail assembly including the lower collar/tail tube (gp11), tail knob (gp9), and appendages (gp12) (6). This process may be initiated through interactions between the motor and gp3 on the terminal end of

the genome (7). However, the connector must somehow prevent the highly pressurized DNA from leaking from the prohead after motor disassembly but before tail assembly. Recently, Grimes et al. (7) implicated the connector channel loops, structures that protrude into the center of the connector and contact DNA, as the mechanism responsible for genome retention. In these experiments, mutated connectors with altered channel loops did not significantly affect DNA translocation but significantly hindered phage maturation. Additionally, Geng et al. (8), Jing et al. (9), and Fang et al. (10) revealed that the connector exhibits genome gating behavior and undergoes a conformational change through a sequence of steps, possibly triggered by interactions between DNA and the C-terminal flexible domain.

Whereas monumental efforts have been made to provide us with a complete picture of the  $\phi$ 29 lifecycle, many of the mechanistic details underlying a number of phage functions are only now emerging. For instance, a recent high-resolution (7.8 Å) cryo-electron microscopy (cryo-EM) reconstruction of  $\phi$ 29 has uncovered a previously undetected feature: an intriguing toroidal structure lodged in the cavity formed between the connector (gp10) and lower collar (gp11) (11) (see Fig. 1). Whereas a previous study (6) reports that the terminal protein gp3 occupies the cavity, Tang et al. (11) report densities consistent with DNA inside the connector-lower collar cavity and gp3 instead resides in the center of the tail channel below the cavity. The DNA density reveals a toroid believed to consist of 30–40 bp of highly bent dsDNA surrounding a central void (11). Although the mechanism needed to form such a highly bent DNA toroid remains unclear, we hypothesize that after DNA packing is completed and the tail is assembled, the connector undergoes a conformational change that opens

Submitted January 17, 2013, and accepted for publication March 20, 2013.

<sup>†</sup>Andrew D. Hirsh and Maryna Taranova contributed equally to this work.

\*Correspondence: [adhirsh@umich.edu](mailto:adhirsh@umich.edu)

Editor: Michael Levitt.

© 2013 by the Biophysical Society  
0006-3495/13/05/2058/10 \$2.00

<http://dx.doi.org/10.1016/j.bpj.2013.03.032>

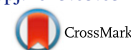

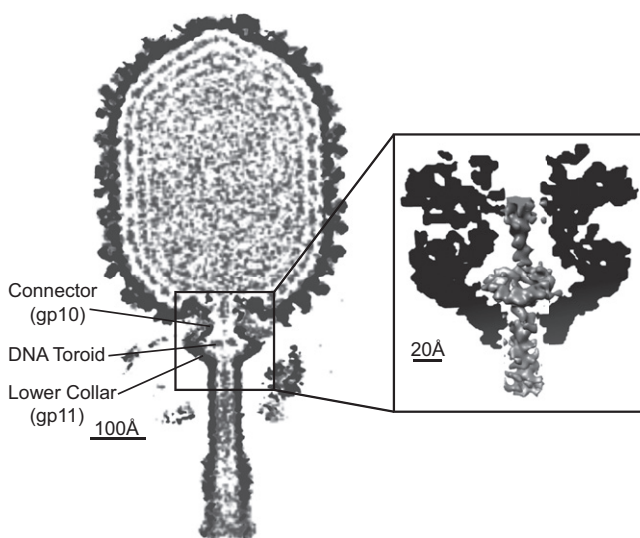

FIGURE 1 Cross section of the three-dimensional cryo-EM  $\phi$ 29 reconstruction (11). The virion map (purple, color online) is overlaid with the emptied map to highlight the genome. (Inset) Region to be simulated; the toroid constrained in the connector/lower collar cavity. Density maps generated with UCSF CHIMERA (36).

the channel and allows the capsid pressure to drive DNA out of the capsid. The capsid pressure, in turn, fills the tail with DNA and forms the toroid. Before the connector opening, the terminal protein gp3 may likely be constrained inside the cavity/tail. Our hypothesis may explain how gp3, with its smallest dimension larger than the diameter of the tail channel (6,12), is compressed and driven to the distal end of the tail. Indeed, the connector has been observed to undergo conformational changes between prohead and maturity stages (6,11). Thus, the  $\phi$ 29 cavity not only permits dsDNA to pass through but is also large enough to allow DNA to bulge outward in forming the observed toroidal supercoil.

Should  $\phi$ 29 compress DNA so tightly that it forms a 30–40-bp toroid of DNA, it would present one of the most extreme cases of DNA bending known to occur in nature. It would also present a unique model system for understanding DNA under extreme compression/bending, a stress state of DNA that has yet to be examined. Close examination of the experimental density map of Tang et al. (11) reveals a 20 Å-thick toroid with outer and inner radii of 29 Å and 9 Å, respectively. This sub-persistence-length toroid shares the same extreme curvature as a 30–40-bp minicircle. By contrast, experiments (13) and atomistic simulations (14) of larger unconstrained 65-bp minicircles reveal a host of noncanonical DNA structures including bubbles, kinks, and wrinkles that form under high bending and torsional stress. Integration host factor has proven capable of wrapping 35 bp of DNA around itself to form a U-turn bend-angle  $>160^\circ$  enabled by two kinked regions (15). Thus, the  $\phi$ 29 protein cavity may similarly preserve dsDNA despite the sharp bending.

Although the biological function of this sub-persistence-length toroidal DNA supercoil remains unknown (16), the mechanical energy stored within such a distinctive structure has led us to question the possible biological function(s) it may serve. In this study, we use computational models to address two major issues.

The first issue is whether dsDNA within the  $\phi$ 29 cavity can form a 30–40-bp toroid under mechanical compression alone. That is, can the virus provide adequate forces to compress DNA into the toroid proposed by Tang et al. (11)? If such a toroid forms, does the DNA remain intact?

The second issue addresses the possible biological functions of this highly energetic DNA structure. Hypotheses we explore include the possible role of the toroid in signaling genome release, stabilizing the pressurized virion, and initiating host infection. Our analysis exploits a multi-scale model for DNA involving a coarse-grain elastic rod model and an all-atom molecular dynamics (MD) model. Our models not only reveal that a DNA toroid can be maintained at force levels below those predicted by experiments, but that the atomic toroidal DNA structure is largely preserved. The predicted density maps compare favorably with that of Tang et al. (11) and suggest an ensemble of different-sized toroids. We also demonstrate that a toroid can fulfill all three proposed hypotheses.

## METHODS

We open with a description of our multiscale modeling approach. Simulating DNA buckling under biologically relevant forces in all-atom MD requires prohibitively large computational resources. One strategy to shorten computation time is to apply significantly higher forces on DNA than exists in the biological system. However, this approach greatly increases the likelihood of forcing the system away from the physical pathway and thereby introducing artifacts into the computed DNA structure. Alternatively, a coarse-grained rod model can efficiently simulate buckling but faces the challenge of representing the true atomistic structure on length scales approaching a helical turn. Therefore, we exploit equilibrium conformations predicted by the rod model as initial conditions for refinement in MD, which significantly reduces computation time yet preserves biologically relevant force levels.

### Modeling cavity contact with the elastic rod

We build upon the computational rod model of Goyal et al. (17,18) and Lillian et al. (19), which describes the dynamic, three-dimensional bending and twisting of the DNA helical axis in response to DNA elasticity, dissipation, and prescribed body forces/torques. The rod stiffness is determined by the bending and torsional persistence length of DNA. The feature that distinguishes this study from related formulations (20–26) is the inclusion of body forces representing the interaction of DNA with the protein cavity formed by the connector and lower collar (refer to Fig. 2 C). We summarize the salient features of this DNA-cavity interaction model by also drawing upon results from Hirsh et al. (27). In addition, an overview of the computational rod model is provided in the [Supporting Material](#).

The  $\phi$ 29 connector/lower collar cavity dictates the constraints for DNA buckling and eventual toroid formation. Although a crystal structure of the monomer of the  $\phi$ 29 connector exists (28), the atomic resolution structure of the lower collar/tail tube is unfortunately unknown. Thus, we must

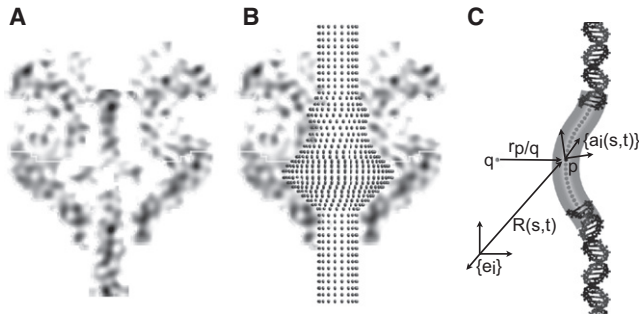

**FIGURE 2** (A) Cross section of the connector/lower-collar cavity with toroidal DNA from Tang et al. (11). (B) Point-wise discretized constraint surface, derived from the protein cavity walls, specifies the location of computational grid points in the rod model or inert atoms in MD rigidly positioned on the cavity surface. (C) The atomic structure of DNA superimposed with an elastic rod with equivalent elastic properties.  $\vec{R}(s,t)$  defines the position of the helical axis as a function of contour length  $s$  and time  $t$  with respect to the inertial frame  $e$ . We also define a body-fixed reference frame  $\mathbf{a}(s,t)$ , which is also a function of  $s$  and  $t$ . The interaction forces are dependent on all pairwise vectors between rod grid points  $p$  and points  $q$  representing the cavity surface.

necessarily make simplifying assumptions to approximate the cavity geometry. We assume, that the cavity is axisymmetric about the viral tail axis. To obtain a smooth cavity, we analyze the cryo-EM density map (see cross section in Fig. 2 A) and employ averaging. Specifically, the density map is sampled at 12 azimuthal angles (each hour on a clock face). For example, the right and left side of the cavity in Fig. 2 A are at 3 and 9 o'clock, respectively. At each azimuthal cross section, we identify the innermost points with nonzero density value. Each of these points is a known distance from the central axis and, upon collecting all points, we construct a best-fit line through the collocation of points that extends from top to bottom on the density map. The best-fit line is used to define the constraint surface, which is then point-wise discretized (see Fig. 2 B).

Although it has been proposed that the negatively charged connector channel interior is responsible for centering DNA in the portal during packaging (28), the charge on the lower collar/tail remains unknown. Therefore, we approximate repulsion by modeling (hard) mechanical contact between DNA and the cavity with an inverse power law given by

$$\vec{F}_{p,q} = \frac{\rho_{\text{DNA}} l_o \rho_{\text{cavity}} A C}{(r_{p,q} - r_o)^\beta} \frac{\vec{r}_{p,q}}{r_{p,q}} \quad (1)$$

In the equation,  $r_{p,q}$  is the distance between a pair of rod ( $p$ ) and cavity ( $q$ ) grid points;  $r_o = 10 \text{ \AA}$  is the assumed physical radius of dsDNA;  $\beta = 6$  is the degree of the power law;  $l_o = 1.7 \text{ \AA}$  is the discretization length of the rod;  $A = 16 \text{ \AA}^2$  is the approximate surface area surrounding each cavity point (cavity grid points are spaced  $\sim 4 \text{ \AA}$  apart);  $\rho_{\text{DNA}} = \rho_{\text{cavity}} = 1$  is the local charge density of each DNA and cavity grid point, respectively; and  $C = 0.1 \text{ pN} \cdot \text{\AA}^6$  is a tunable constant. In Hirsh et al. (27), we examined the sensitivity to the above computational parameters, including setting  $\beta$  to 4 and 8 and order-of-magnitude changes to  $C$ , and observed only minuscule differences in computed solutions. To determine if solutions remain invariant to finer cavity point spacing, we used values of 2  $\text{\AA}$  and 1  $\text{\AA}$ , and observed insignificant changes that assure convergence for 4  $\text{\AA}$ . The net cavity contact force acting on rod grid point  $p$  is the sum over all pairwise interactions with  $M$  cavity grid points, per

$$\vec{F}_{p,\text{cavity}} = \sum_{q=1}^M \frac{\rho_{\text{DNA}} l_o \rho_{\text{cavity}} A C}{(r_{p,q} - r_o)^\beta} \frac{\vec{r}_{p,q}}{r_{p,q}} \quad (2)$$

This contact force is inserted into the discretized equations of motion for the rod as an additional contribution to the body force  $\vec{F}_{\text{body}}$  appearing in the Supporting Material.

## Constructing the two-dimensional energy landscape

Each equilibrium conformation of DNA inside the cavity predicted by the rod model was energy-minimized in an all-atom force field. To overcome the absent atomic structures required for simulating the atomistic cavity constraints, we make the following simplifying approximations. We represent the cavity points as Lennard-Jones atoms (with mass and van der Waals radius of a helium atom equal to 1.48  $\text{\AA}$  and fixed in Cartesian space at points shown in Fig. 2 B) to enforce hard contact between DNA and the cavity wall. This approach permits simulation of DNA within the constraints of the cavity, and it can be refined to capture atomic details when additional crystal structure data is available.

A free parameter in the interaction potential with the cavity boundaries is the depth of the L-J potential well,  $\epsilon$ , and we conduct identical MD simulations varying  $\epsilon$  over various orders of magnitude ( $\epsilon = 0.02, 0.2, 2.0$ , and 20 kcal/mol). The most stable DNA structures are observed for  $\epsilon = 0.2$  kcal/mol and this value is adopted in all energy minimization runs (see Fig. S1 and text in the Supporting Material for additional results and a discussion of sensitivity to  $\epsilon$ ).

The minimization procedure was performed with CHARMM package (29) using the generalized Born molecular volume (GBMV II) implicit solvation model (30–32). The minimization protocol consisted of 1000 steps of steepest descent minimization followed by 1000 steps of minimization using the Adopted Basis Newton-Raphson algorithm. The total energy of the system for each of the DNA conformations was calculated as an average over the last 100 steps from the minimization run.

Minimization, equilibration, and production runs were performed using the CHARMM27 force field (33). During all MD simulations, the nonbonded list was generated with a cutoff of 21  $\text{\AA}$ ; the cutoff for nonbonded interactions and the onset of switching for nonbonded interactions were set to 18  $\text{\AA}$  and 16  $\text{\AA}$ , respectively.

## MD simulation details

The equilibrium conformation of DNA with a toroid size of 33 bp and DNA registry value of 280° predicted by the elastic rod model was used as the initial structure for all-atom MD simulation. All MD trajectories were obtained with the NAMD package (34). The solvation effects during the simulation were described by the generalized Born implicit solvent model of Onufriev et al. (35) with a cutoff of 16  $\text{\AA}$  for calculating the Born radius. The salt concentration was set to the default value of 0.2 M.

Initially, the system was energy-minimized for 5000 integration steps. Next, the system was slowly heated to 300 K in 50 K increments for each 200 ps. To prevent translation of the DNA ends along the tail tube, the motion of the terminal DNA basepairs along the tail tube direction was harmonically restrained by a force constant of 50 kcal/mol/ $\text{\AA}^2$ . To preserve the duplex DNA structure during heating, two types of harmonic restraints, each with force constant of 100 kcal/mol/ $\text{\AA}^2$ , were applied on the DNA atoms:

1. Root-mean-square displacements of heavy atoms were restrained to an initial structure; and
2. Donor-acceptor distances between complementary DNA bases were restrained to 3  $\text{\AA}$ .

This heating stage was followed by constant temperature equilibration with 8 ns of slow release of the harmonic restraints (further details are given in Table S1 in the Supporting Material). The average temperature of the system was maintained at 300 K via Langevin thermostat with a coupling coefficient of 5 ps<sup>-1</sup>. The vibrations of covalent bonds to hydrogen atoms

were harmonically restrained, which allowed 2-fs integration time steps during the MD runs. After equilibration, the simulation proceeded for 2 ns with the only restraints applied on the terminal DNA basepair. The final 2 ns of simulation time were used for the collection and analysis of equilibrium data.

### Constructing predicted density maps

UCSF CHIMERA (36) was used to generate the predicted density maps from rod-model computed toroids using the built-in function MOLMAP. Grid spacing is set to 1 Å and the width of the Gaussian distribution used to describe each atom,  $\sigma$ -factor, is set to 0.425. Rotational averaging is performed using cyclic symmetry by placing 100 equivalent copies around the vertical tail axis. A cross section is taken and 20 color bins are scaled between the highest volume data value (yellow) relative to the lowest (dark blue). The density maps remain unchanged upon adding more copies so long as the number of copies is sufficient. Thus, the maps are well converged using 100 copies. To smooth the color gradients, per-pixel coloring is selected. All other settings are default.

## RESULTS

### Toroid conformations predicted by rod model

After the tail machinery (including the lower collar, tail tube, and tail knob) is installed, the connector presumably allows an amount of DNA to escape, which, driven by high capsid pressure, descends to fill the tail and cavity. The resulting equilibrium conformations of a short (75-bp) segment of DNA are computed from the rod model including DNA within the cavity and short sections in the tube above and below the cavity. In the simulations, DNA is compressed from a nearly straight conformation to a highly buckled toroidal conformation. The buckling is simulated by allowing 1 bp at a time to descend from the top portion of the connector tube into the cavity until an excess of 33 bp fills the cavity, forming a buckled toroid. During this simulation, the lower boundary is held fixed against translation while the upper boundary undergoes a quasi-static prescribed translation. The excess DNA fills the cavity and increases the toroid size.

In addition, the only rotation permitted at the lower boundary is rotation about the helical axis, which relieves any additional DNA twist during buckling. No rotations are permitted at the upper boundary. Images of selected equilibrium conformations during buckling are shown in Fig. 3 and the associated terminal compressive force and elastic strain energy of the DNA are reported in Fig. 4. Although all equilibrium conformations remain twist-free, the initial condition is a nearly straight right-handed supercoil that biases the formation of a right-handed toroid thereafter. Although it is unknown whether the actual toroid is right- or left-handed, Yu et al. (37) determined that the packing motor twists DNA in a left-handed sense during packaging. As DNA exits the capsid, we hypothesize that DNA will relax by twisting in the opposite direction, thereby biasing the formation of a right-handed toroid.

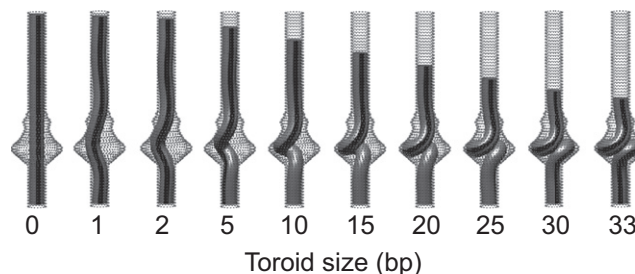

FIGURE 3 Rod model predicts toroid formation in the  $\phi$ 29 cavity. Snapshots of twist-free equilibrium conformations as a function of toroid size (basepairs). (Black stripe) Aid in visualizing the twist state of DNA. During supercoil formation, twist is relieved through the lower boundary.

### Structural equilibration of toroids using MD simulations

The initial condition for atomistic simulation is obtained by fitting an all-atom representation of B-form DNA around the DNA helical axis predicted by the rod model (using the Model.it toolset (38)). Because fitting involves placing pre-optimized basepair geometries perpendicular to the helical axis, we are left with a free parameter, referred to as the registry parameter. Specifically, the DNA atoms can be barrel-rolled about the helical axis without changing the linking number. This registry parameter may play an important energetic role because it dictates how the negatively charged sugar-phosphate backbones align at the entry and exit of the toroidal DNA, an effect not included in the rod model. We next perform all-atom energy minimizations of the DNA structures over a two-parameter space defined by toroid size and registry. The result for right-handed toroids, Fig. 5, illustrates the total potential energy landscape and its constituent parts. The limiting 33-bp case represents the largest toroid contained in the cavity without nonphysical overlap of the sugar-phosphate backbone. For completeness, the energy landscape for left-handed toroids is shown in Fig. S2 in the Supporting Material.

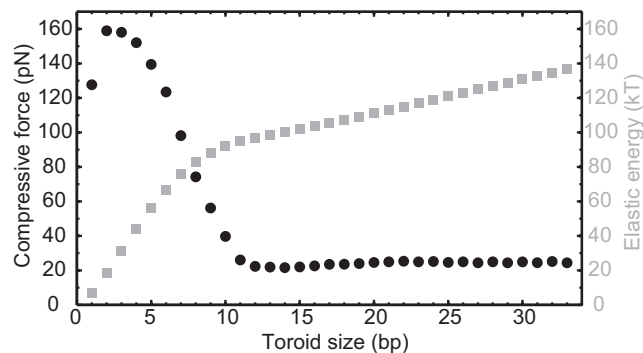

FIGURE 4 Compressive force required to form a toroid is well within packing motor capabilities (25 pN for toroids >10 bp). Plotted are DNA internal (elastic strain) energy (gray squares) and compressive force (black circles) as a function of toroid size. DNA is initially nearly straight while the top boundary descends in the tube one basepair (3.4 Å) at a time.

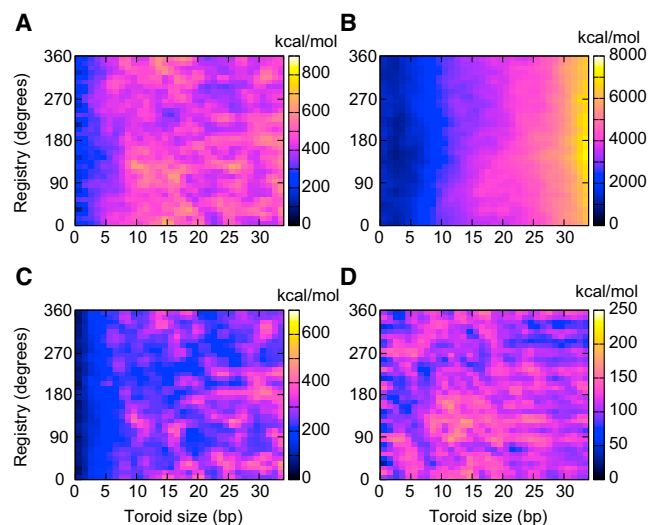

FIGURE 5 Energy landscape of all possible DNA conformations over the two-parameter space of toroid size and registry. (A) Potential energy landscape and its (B) electrostatic, (C) bonded, and (D) van der Waals components for right-handed toroids. To highlight energetic differences between conformations, energy values are scaled relative to the minimum value in the corresponding landscape.

The absolute energies of the all-atom force field are associated with a rapid increase in the repulsive electrostatic energy of the system as the highly charged DNA is being compressed within a confined volume. The hard (Lennard-Jones) interaction potential between DNA and the cavity wall, whose rigidity is enforced in our model, confines this highly energetic DNA state and mimics the way the protein environment would confine it. Although the absolute energy values are high, they are not, in relative considerations, higher than those expected in the real biological case of a protein viral capsid where DNA is highly pressurized to  $\sim 40$  atm (39). Additionally, measurements of Young's modulus using scanning force microscopy show that the protein shells of bacteriophages are extremely resilient and can withstand nanoNewton forces (40). Moreover, the forces derived in our models are of the same order of magnitude as those reported in Smith et al. (2) and we therefore expect that the cavity can accommodate these force levels without significant deformation. Although the formal possibility exists that the energy values associated with DNA compression inside the protein cavity can be smaller than those predicted with our simplified approach (because of the simplifications in the potential), the model gives important insights into the energetic dependence of various DNA toroidal shapes inside the confined volume of the exit cavity of  $\phi 29$ .

To determine the atomic equilibrium structure of the toroid, we choose a representative toroid from the described landscape (33 bp, registry  $280^\circ$ ) (Fig. 6, A and B) and perform an equilibration in MD. Equilibration proceeds for 8 ns, followed by 2 ns of production run (see Methods for simulation protocol). To enforce identical boundary conditions in MD, the terminal basepairs are harmonically

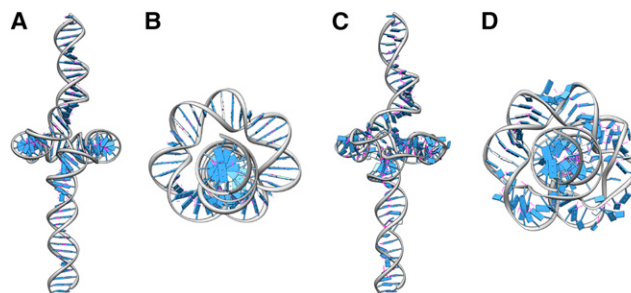

FIGURE 6 Molecular dynamics model of atomic DNA structure highly bent and under extreme compression. (A and B) Front and top views of all-atom initial condition of a 33-bp toroid with helical axis predicted by rod model inside the constraints of the cavity. The DNA sequence is the first 75 bps from the  $\phi 29$  genome. (C and D) Same views of final conformations after MD equilibration within the constraints of the cavity show that base-pairing is preserved. (Magenta) Hydrogen bonds. All atomistic DNA graphics generated with UCSF CHIMERA (36).

restrained against translation along the tail tube but permitted to rotate about the tail axis. Fig. 6, C and D, shows front and top views of the equilibrated structure, respectively.

### Comparison with experimental cryo-EM density map

The all-atom energy-minimized conformations are used to generate predicted density maps for direct comparison with the experimental cryo-EM density map (two orthogonal cross sections are shown in Fig. 7 B) (11). In the experimental reconstruction, density attributed to DNA is obtained through subtraction of two maps: the virion reconstruction (EMD-1420) minus the post-ejection emptied reconstruction (EMD-1419) found in the EBI-MSD EMD database. Recall that the capsid exhibits fivefold symmetry

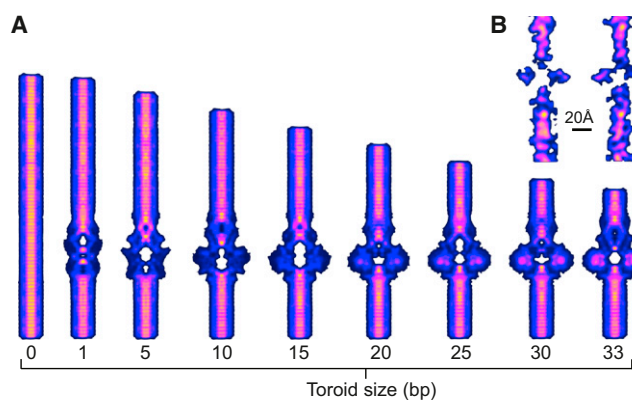

FIGURE 7 Predicted density maps compared side by side with experimental data. (A) Predicted maps for different-sized toroids. (B) Two orthogonal cross sections of the experimental cryo-EM density map (11). (Yellow and dark blue) Regions of highest and lowest intensity, respectively. Rotational averaging of the conformation was performed using UCSF CHIMERA (36). Consistent with the experimental results, the color scale is determined by scaling the highest intensity bin relative to the lowest intensity bin (see Methods).

whereas the connector/tail exhibits 12-fold symmetry. Although these components aid in aligning the exterior of the two-dimensional particle images, the interior toroid may not possess the same azimuthal orientation from particle to particle. That is, if the buckled DNA is randomly oriented within the interior cavity, then the resulting EM map will appear smeared-out upon rotational averaging of images about the tail axis. To mimic this process, we rotationally average conformations of increasing toroid size (while maintaining, e.g.,  $280^\circ$  registry) with the resulting cross sections of predicted density maps shown in Fig. 7 A (see Fig. S3 and text in the Supporting Material for additional maps with varying toroid registry and handedness).

### Simulating ejection dynamics

During infection, the distal end of the tail knob opens to allow the genome to exit the virus (6). Once opened, the highly energetic toroid will undergo dynamic collapse and ejection from the cavity. We hypothesize that toroid collapse/ejection could play an important role in initiating infection, for example, by acting as a signaling mechanism. To address this hypothesis, we return to the rod model to simulate the ejection dynamics induced by toroid collapse and over long timescales that are practically inaccessible to MD.

The initial condition to the ejection simulation is adapted from the rod-model-predicted equilibrium conformation (the 33-bp toroid in Fig. 3). To account for viscous drag effects, an additional 80 bp of DNA is added beneath the toroid to the opening of the tail tube. The viscous drag model for DNA (41) follows the numerical implementation of Lillian et al. (19) and Hirsh et al. (27) (see the Supporting Material). At the opening of the tail tube (bottom), the rod remains restrained against rotation about the two transverse axes, but is now free to translate along and rotate about the tail (vertical) axis after the (assumed instantaneous) opening of the tail knob. The upper boundary remains clamped and fixed by the possible pinching of the connector and reacts to highly dynamic forces and torques induced during toroid collapse. The predicted axial reaction force and torque during this collapse are reported in Fig. 8 as functions of reduced time.

The reduced timescale in Fig. 8 B is obtained by dividing simulation time ( $t$ ) by the time required for the toroid to completely straighten and eject ( $\tau$ ). Thus Fig. 8 A illustrates the conformation of the DNA toroid at times corresponding to 0, 25, 50, 75, and 100% of full ejection. Whereas  $\tau$  obviously depends on the selected friction model, the important findings illustrated in Fig. 8 do not. In particular, note the large reaction force and torque developed at the upper boundary right as the toroid straightens. These large reactions arise regardless of the assumed friction model which, for computational expediency, presently underestimates the total friction; it accounts for hydrodynamic drag and not the

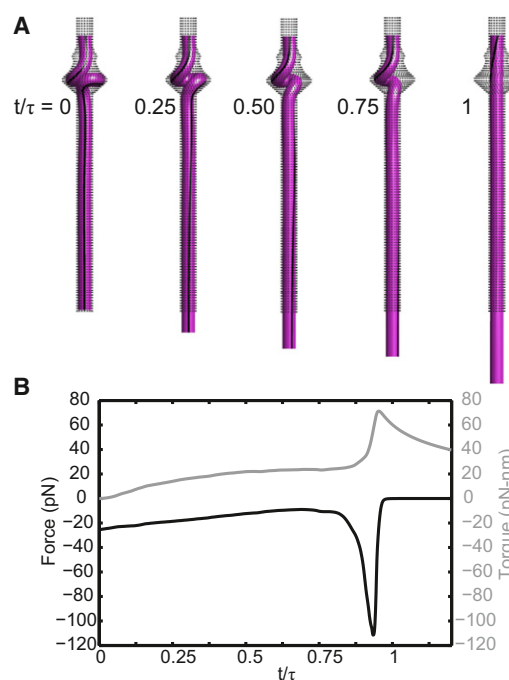

FIGURE 8 Rod model of toroid collapse predicts large reaction force/torque at the connector. (A) Snapshots show instantaneous conformations during ejection. (B) Axial reaction force and torque at the upper boundary as a function of reduced time  $t/\tau$ , where  $\tau$  is the time required for the toroid to fully straighten and can range from  $\sim\tau = 6.8\text{--}68 \mu\text{m}$  (see text for discussion).

(unknown) friction of DNA within the tail tube of  $\phi$ 29. If one were to adopt the much larger (by 2–3 orders of magnitude) friction coefficients estimated from experiments on bacteriophage- $\lambda$  ejection (42) ( $0.17\text{--}2.4 \text{ N}\cdot\text{s}/\text{m}^2$ ), then the predicted ejection times would range from  $6.8 < \tau < 68 \mu\text{m}$ .

## DISCUSSION

### The existence and geometry of the toroid

Both the rod and MD models corroborate the existence of a highly strained toroid within the small connector-lower collar cavity. Results from the rod model confirm that the capsid pressure is sufficient to mechanically compress and maintain DNA in a toroidal shape within the cavity. Inspection of Fig. 4 reveals that as the bucking process begins, the DNA deflects outward into a slender but stiff helical buckle that requires high compressive force (refer to Fig. 3). After 2 bp are inserted, DNA contacts the cavity wall, which further constrains the structure and results in maximum compression ( $\sim 160$  pN). As the upper boundary descends further, the DNA buckles dramatically to fill the cavity interior. This large-scale buckling creates a substantially more compliant structure, and significantly smaller compressive forces are therefore required for DNA equilibrium (refer to Fig. 4 for bp  $> 10$  where compressive forces is reduced

to a modest  $\sim 25$  pN). Therefore as the toroid evolves, the compressive forces remain nearly constant at  $\sim 25$  pN which, by comparison, is  $\sim 25\%$  of the maximum force achievable by the packing motor.

During the initial buckling of DNA (Fig. 4), the rod model also predicts forces that exceed those achievable by the packing motor. However, these high initial forces result from the particular pathway to toroid formation chosen for this computation. The results illustrated in Fig. 4 follow from a near perfectly straight DNA segment that also remains torque-free—both limiting conditions that require the greatest compressive force to initiate buckling. The addition of any intrinsic DNA curvature, torque, or localized defects would significantly reduce the compressive force required to initiate buckling. For instance, the supercoiled capsid DNA would likely impart torque to the DNA as it descends through the tail tube, which in turn will reduce the compressive force required to initiate buckling (43). Therefore, our results demonstrate that the capsid pressure provides sufficient driving force to buckle DNA into a toroid in this confined volume.

Upon refining the rod-predicted initial condition, the computed energy landscape in Fig. 5 illustrates energetic dependence on both toroid size and registry. The potential energy (Fig. 5 A) and the elastic strain energy estimated with the rod model (Fig. 4) both increase with toroid size as expected. Furthermore, both models predict a rapid energy increase at the initial stage of compression (for toroids up to  $\sim 10$  bp). Inspection of Fig. 5 B reveals that the electrostatic energy component monotonically increases as more DNA enters the cavity, an effect independent of registry as expected. By contrast, DNA-bonded energy and the van der Waals energy of the system exhibit dependence on size and registry. The variations in the potential energy (Fig. 5 A), which largely follow that of the bonded and van der Waals components, do not suggest a single favorable toroid size or registry. Instead, these results suggest that an ensemble of toroids may exist. Additionally, the energy landscape for left-handed toroids (see Fig. S2) remains energetically equivalent to the right-handed landscape, suggesting no energetic preference exists regarding toroid handedness.

The predicted maps in Fig. 7 A share many qualitative characteristics with the experimental map (11) and further argue for an ensemble of toroids. Note the appearance of a central void as soon as DNA buckles and the toroid intensity increases with toroid size as more DNA fills the cavity. In the straight tube sections above and below the toroid, observe extensive low (*dark blue*) and intermediate (*light blue*) intensity regions with patches of high intensity (*magenta* and *yellow*) near the center of the tail axis consistent with the experimental map. Also observe the low-intensity region joining the toroid to the high-intensity straight segments above and below it, as noted in Tang et al. (11). All predicted maps for toroids larger than  $\sim 20$  bp similarly

exhibit sharp (nearly  $90^\circ$ ) density transitions between straight and toroidal sections. For these larger toroids, note the dominant regions of intermediate (*light blue*) and high (*magenta*) intensities in the toroid that are consistent with the intensities reported in the experiments. Smaller toroids, by contrast, do not possess the high-intensity regions observed in the experiments. Although difficult to discern exact toroid size and registry, we observe matching high (*magenta*) intensity in the toroid for sizes of  $\sim 20$  bp and larger. Thus, the experimental density map may reflect an averaged ensemble of toroids weighted toward larger ones (consistent with results in Fig. 5). Additionally, the shape of the void at the center of the toroid (as well as the existence and shape of the smaller voids above and below the toroid) changes with toroid size, registry, and handedness, but an ensemble average would also mask these dependencies (see Fig. S3 for predicted density maps for varying handedness and registry).

Beyond the qualitative similarities noted above, the predicted density maps (Fig. 7 A) also share remarkable quantitative similarities to the experimental map. Tang et al. (11) report a 20 Å-thick toroid possessing an outer and inner diameter of 58 Å and 18 Å, respectively. Despite the small differences in the central void, the dimensions of the larger toroids remain remarkably consistent with these experimental measurements. In particular, the predicted toroid thickness and the inner diameter (distance between the high intensity regions) are  $\sim 20$  Å, whereas the outer diameter is  $\sim 60$  Å (dictated of course by the diameter of the cavity).

Equilibration in all-atom MD simulations reveal that the initial toroid predicted by the rod model is largely preserved despite sharp bending and compression. Observe in Fig. 6 that the initial condition matches reasonably well with the MD-equilibrated structure and both confirm the existence of a central void. Aside from a few regions where we observe basepair flipping, the DNA remains double-stranded. The small denatured regions may also be an artifact arising from the assumed interaction potential with helium atoms, which likely do not fully represent the biological system. To explore the implications of our assumptions, we have applied the model using several interaction potentials, characterized the sensitivity to this parameter, and speculate on the biological implications (see Supporting Material text and Fig. S1). From our systematic analysis emerges a model whereby dsDNA denaturation is limited in large part by the nonspecific interaction with the cavity.

The objective of this article is to explore the hypothesis put forth by Tang et al. (11) that DNA forms a toroidal structure. A coarse-grain model, an MD model, and predicted cryo-EM density maps all provide consistent evidence for a toroid. However, for completeness we must also recognize that there are other structures that could yield the split density in the entry/exit cavity including DNA strand

separation, as observed in Podovirus P-SSP7 (44), flipped bases, a cruciform, etc.

### Possible functions of the toroid

Recent experiments conducted after the reconstruction of Tang et al. (11) have increased our understanding of the sequence of conformational changes in the  $\phi$ 29 connector. In light of these discoveries, we explore several possible biological functions of the toroid, including its ability to not only stabilize the mature virion but possibly trigger a conformational change.

1. Toroid collapse triggers genome release: The dynamic collapse of the toroid could function as a signaling mechanism to initiate the release of the capsid DNA. Our simulations predict a rapid dynamic collapse of the toroid, which would occur well before the remainder of the genome would be ejected from the capsid. During collapse, the compressive force on the connector increases fourfold from its value at equilibrium (see Fig. 8). In fact, this reaction force as well as the reaction torque achieve maxima right as the toroidal DNA straightens. It is impressive that rapid toroid collapse generates forces ( $\sim 110$  pN) on par with the strongest known molecular motors and without the need for additional ATP. This tandem reaction force/torque shock might disturb the highly organized genome. Additionally, a recent study by Geng et al. (8) on the gating mechanism in the  $\phi$ 29 connector concluded that it could undergo stages of conformational change mediated by contact between DNA and the C-terminal flexible domain. If the C-terminal domain acts as the trigger to induce conformational changes, then it is possible that the large reaction forces/torques could cause DNA/trigger contact, initiating yet another conformational change. While the connector undergoes a conformational change upon DNA packing (7) to hold the pressurized genome inside the capsid, we hypothesized that it must also undergo a second conformational change to open the connector and allow DNA leakage back through the tail. Toroid collapse may further dilate the connector to allow unhindered genome escape. Additionally, it has been proposed that a triggered conformational change in bacteriophage SPP1 (45) and P22 (46) opens the connector and enables genome ejection. Finally, the large force/torque occurs right as DNA straightens and their magnitude is independent of toroid size. This size independence renders toroid collapse a robust signaling mechanism.
2. Toroid stabilizes pressurized virion: At first glance, the toroid resembles a single turn of a helical spring that may help stabilize the densely packed genome. Changes in environmental conditions (e.g., temperature or ionic conditions) over the life of  $\phi$ 29 cause fluctuations in

the highly pressurized capsid DNA. In fact, the dynamics of bacteriophage genome ejection have been probed by perturbing ionic conditions, which in turn affect capsid pressure (47). The flexible toroid could serve as an essential source of mechanical compliance, allowing the tightly packed capsid to remain stable despite environmentally induced pressure fluctuations. This possibility follows from the force-deflection curve of Fig. 4, which confirms that a large change in toroid size produces little-to-no change in DNA compression (remains at  $\sim 25$  pN for toroids larger than 10 bp). By contrast, a straight column of DNA provides little compliance and potentially induces much larger stresses in the capsid protein shell in response to environmental disturbances.

3. Toroid initiates host infection: Upon opening the tail knob during infection, toroid collapse may rapidly push the terminal protein gp3  $\sim 30$ – $40$  bp into the host cell, a process requiring no aid from the capsid pressure or additional ATP. Hydrolytic enzymes decorating the tail knob (gp13) help degrade the  $\sim 250$  Å host cell wall (48–50). Thus, as the tail knob bores into the host, the toroid could push gp3 significantly into the cell wall/membrane to help degrade/puncture it.

### CONCLUSIONS

In summary, we employ a continuum-elastic rod and an all-atom MD model to simulate DNA buckling into a toroid and its subsequent ejection from the connector-lower collar cavity. The rod model predicts that an ensemble of toroids can mechanically form under biologically relevant force levels. Equilibration in MD reveals that the dsDNA structure is largely preserved under sharp bending through nonspecific interactions with the cavity. Both the energy landscape and the predicted density maps support the likelihood of an ensemble of different-sized toroids that combine to form the averaged experimental density map. Upon simulating the dynamic ejection of the toroid, we compute large reaction forces/torques at the connector, which may signal an additional conformational change to allow the capsid DNA's unhindered escape into the host cell. We hypothesize that the mechanics of DNA may not only help stabilize the phage, but also play an active role in governing genome release. Higher-resolution reconstructions of other bacteriophages may reveal similar DNA structures in the phage portal/tail.

### SUPPORTING MATERIAL

Three figures, eleven equations, one table, and references (51–61) are available at [http://www.biophysj.org/biophysj/supplemental/S0006-3495\(13\)00371-8](http://www.biophysj.org/biophysj/supplemental/S0006-3495(13)00371-8).

The authors thank Tim Baker, Charles Brooks III, Craig Hetherington, Prashant Purohit, David Sivak, and Jinghua Tang for fruitful discussions.



This work is funded by the National Science Foundation under grant No. CMMI-0941470.

## REFERENCES

- Tao, Y., N. H. Olson, ..., T. S. Baker. 1998. Assembly of a tailed bacterial virus and its genome release studied in three dimensions. *Cell*. 95:431–437.
- Smith, D. E., S. J. Tans, ..., C. Bustamante. 2001. The bacteriophage straight  $\phi$ 29 portal motor can package DNA against a large internal force. *Nature*. 413:748–752.
- Chemla, Y. R., K. Athavan, ..., C. Bustamante. 2005. Mechanism of force generation of a viral DNA packaging motor. *Cell*. 122:683–692.
- Fuller, D. N., J. P. Rickgauer, ..., D. E. Smith. 2007. Ionic effects on viral DNA packaging and portal motor function in bacteriophage  $\phi$ 29. *Proc. Natl. Acad. Sci. USA*. 104:11245–11250.
- Rickgauer, J. P., D. N. Fuller, ..., D. E. Smith. 2008. Portal motor velocity and internal force resisting viral DNA packaging in bacteriophage  $\phi$ 29. *Biophys. J.* 94:159–167.
- Xiang, Y., M. C. Morais, ..., M. G. Rossmann. 2006. Structural changes of bacteriophage  $\phi$ 29 upon DNA packaging and release. *EMBO J.* 25:5229–5239.
- Grimes, S., S. Ma, ..., P. J. Jardine. 2011. Role of  $\phi$ 29 connector channel loops in late-stage DNA packaging. *J. Mol. Biol.* 410:50–59.
- Geng, J., H. Fang, ..., P. Guo. 2011. Three reversible and controllable discrete steps of channel gating of a viral DNA packaging motor. *Biomaterials*. 32:8234–8242.
- Jing, P., F. Haque, ..., P. Guo. 2010. One-way traffic of a viral motor channel for double-stranded DNA translocation. *Nano Lett.* 10:3620–3627.
- Fang, H., P. Jing, ..., P. Guo. 2012. Role of channel lysines and the “push through a one-way valve” mechanism of the viral DNA packaging motor. *Biophys. J.* 102:127–135.
- Tang, J., N. Olson, ..., T. S. Baker. 2008. DNA poised for release in bacteriophage  $\phi$ 29. *Structure*. 16:935–943.
- Kamtekar, S., A. J. Berman, ..., T. A. Steitz. 2006. The  $\phi$ 29 DNA polymerase: protein-primer structure suggests a model for the initiation to elongation transition. *EMBO J.* 25:1335–1343.
- Du, Q., A. Kotlyar, and A. Vologodskii. 2008. Kinking the double helix by bending deformation. *Nucleic Acids Res.* 36:1120–1128.
- Mitchell, J. S., C. A. Laughton, and S. A. Harris. 2011. Atomistic simulations reveal bubbles, kinks and wrinkles in supercoiled DNA. *Nucleic Acids Res.* 39:3928–3938.
- Rice, P. A., S. Yang, ..., H. A. Nash. 1996. Crystal structure of an IHF-DNA complex: a protein-induced DNA U-turn. *Cell*. 87:1295–1306.
- Casjens, S. R., and I. J. Molineux. 2012. Short noncontractile tail machines: adsorption and DNA delivery by podoviruses. *Adv. Exp. Med. Biol.* 726:143–179.
- Goyal, S., N. C. Perkins, and C. L. Lee. 2005. Nonlinear dynamics and loop formation in Kirchhoff rods with implications to the mechanics of DNA and cables. *J. Comput. Phys.* 209:371–389.
- Goyal, S., T. Lillian, ..., N. C. Perkins. 2007. Intrinsic curvature of DNA influences LacR-mediated looping. *Biophys. J.* 93:4342–4359.
- Lillian, T. D., M. Taranova, ..., N. C. Perkins. 2011. A multiscale dynamic model of DNA supercoil relaxation by topoisomerase IB. *Biophys. J.* 100:2016–2023.
- Domokos, G., P. Holmes, and B. Royce. 1997. Constrained Euler buckling. *J. Nonlinear Sci.* 7:281–314.
- Holmes, P., G. Domokos, ..., I. Szeberenyi. 1999. Constrained Euler buckling: an interplay of computation and analysis. *Comput. Method. Appl. M.* 170:175–207.
- Holmes, P., G. Domokos, and G. Hek. 2000. Euler buckling in a potential field. *J. Nonlinear Sci.* 10:477–505.
- Manning, R., and G. Bulman. 2005. Stability of an elastic rod buckling into a soft wall. *Proc. Roy. Soc. A Math. Phys.* 461:2423–2450.
- van der Heijden, G. 2001. The static deformation of a twisted elastic rod constrained to lie on a cylinder. *Proc. Roy. Soc. A Math. Phys.* 457:695–715.
- van der Heijden, G. H. M., M. A. Peletier, and R. Planque. 2006. Self-contact for rods on cylinders. *Arch. Ration. Mech. Anal.* 182:471–511.
- Thompson, J. M. T., M. Silveira, ..., M. Wiercigroch. 2012. Helical post-buckling of a rod in a cylinder: with applications to drill-strings. *Proc. Roy. Soc. A Math. Phys.* 468:1591–1641.
- Hirsh, A. D., T. D. Lillian, ..., N. C. Perkins. 2013. A model for highly strained DNA compressed inside a protein cavity. *J. Comput. Nonlin. Dyn.* 8:031001.
- Simpson, A. A., Y. Tao, ..., M. G. Rossmann. 2000. Structure of the bacteriophage  $\phi$ 29 DNA packaging motor. *Nature*. 408:745–750.
- Brooks, B. R., R. E. Bruccoleri, ..., M. Karplus. 1983. CHARMM—a program for macromolecular energy, minimization, and dynamics calculations. *J. Comput. Chem.* 4:187–217.
- Lee, M. S., M. Feig, ..., C. L. Brooks, 3rd. 2003. New analytic approximation to the standard molecular volume definition and its application to generalized Born calculations. *J. Comput. Chem.* 24:1348–1356.
- Feig, M., A. Onufriev, ..., C. L. Brooks, 3rd. 2004. Performance comparison of generalized Born and Poisson methods in the calculation of electrostatic solvation energies for protein structures. *J. Comput. Chem.* 25:265–284.
- Chocholousová, J., and M. Feig. 2006. Implicit solvent simulations of DNA and DNA-protein complexes: agreement with explicit solvent vs experiment. *J. Phys. Chem. B*. 110:17240–17251.
- MacKerell, Jr., A. D., N. Banavali, and N. Foppe. 2000–2001. Development and current status of the CHARMM force field for nucleic acids. *Biopolymers*. 56:257–265.
- Phillips, J. C., R. Braun, ..., K. Schulten. 2005. Scalable molecular dynamics with NAMD. *J. Comput. Chem.* 26:1781–1802.
- Onufriev, A., D. Bashford, and D. Case. 2000. Modification of the generalized Born model suitable for macromolecules. *J. Phys. Chem. B*. 104:3712–3720.
- Pettersen, E. F., T. D. Goddard, ..., T. E. Ferrin. 2004. UCSF CHIMERA—a visualization system for exploratory research and analysis. *J. Comput. Chem.* 25:1605–1612.
- Yu, J., J. Moffitt, ..., G. Oster. 2010. Mechanochemistry of a viral DNA packaging motor. *J. Mol. Biol.* 400:186–203.
- Vlahovicek, K., L. Kaján, and S. Pongor. 2003. DNA analysis servers: Plot.it, Bend.it, Model.it and IS. *Nucleic Acids Res.* 31:3686–3687.
- Hernando-Pérez, M., R. Miranda, ..., P. J. de Pablo. 2012. Direct measurement of phage  $\phi$ 29 stiffness provides evidence of internal pressure. *Small*. 8:2366–2370.
- Ivanovska, I. L., P. J. de Pablo, ..., G. J. Wuite. 2004. Bacteriophage capsids: tough nanoshells with complex elastic properties. *Proc. Natl. Acad. Sci. USA*. 101:7600–7605.
- Howard, J. 2001. *Mechanics of Motor Proteins and the Cytoskeleton*. Sinauer Associates, Sunderland, MA.
- Grayson, P., L. Han, ..., R. Phillips. 2007. Real-time observations of single bacteriophage  $\lambda$  DNA ejections in vitro. *Proc. Natl. Acad. Sci. USA*. 104:14652–14657.
- Greenhill, A. G. 1883. On the strength of shafting when exposed both to torsion and to end thrust. *Proc. Inst. Mech. Eng.* 6:182–225.
- Liu, X., Q. Zhang, ..., W. Chiu. 2010. Structural changes in a marine podovirus associated with release of its genome into *Prochlorococcus*. *Nat. Struct. Mol. Biol.* 17:830–836.
- Plisson, C., H. E. White, ..., E. V. Orlova. 2007. Structure of bacteriophage SPP1 tail reveals trigger for DNA ejection. *EMBO J.* 26:3720–3728.
- Chang, J., P. Weigele, ..., W. Jiang. 2006. Cryo-EM asymmetric reconstruction of bacteriophage P22 reveals organization of its DNA packaging and infecting machinery. *Structure*. 14:1073–1082.

47. Wu, D., D. van Valen, ..., R. Phillips. 2010. Ion-dependent dynamics of DNA ejections for bacteriophage  $\lambda$ . *Biophys. J.* 99:1101–1109.
48. Moak, M., and I. J. Molineux. 2004. Peptidoglycan hydrolytic activities associated with bacteriophage virions. *Mol. Microbiol.* 51:1169–1183.
49. Xiang, Y., M. C. Morais, ..., M. G. Rossmann. 2008. Crystal and cryoEM structural studies of a cell wall degrading enzyme in the bacteriophage  $\phi$ 29 tail. *Proc. Natl. Acad. Sci. USA.* 105:9552–9557.
50. Cohen, D. N., Y. Y. Sham, ..., D. L. Popham. 2009. Shared catalysis in virus entry and bacterial cell wall depolymerization. *J. Mol. Biol.* 387:607–618.
51. Balaeff, A., L. Mahadevan, and K. Schulten. 2006. Modeling DNA loops using the theory of elasticity. *Phys. Rev. E Stat. Nonlin. Soft Matter Phys.* 73:031919.
52. Beveridge, D. L., M. A. Young, and D. Sprous. 1998. Modeling of DNA via molecular dynamics simulation: structure, bending, and conformational transitions. *ACS. Sym. Ser.* 682:260–284.
53. Bryant, Z., M. D. Stone, ..., C. Bustamante. 2003. Structural transitions and elasticity from torque measurements on DNA. *Nature.* 424:338–341.
54. Bustamante, C., Z. Bryant, and S. B. Smith. 2003. Ten years of tension: single-molecule DNA mechanics. *Nature.* 421:423–427.
55. Chung, J., and G. M. Hulbert. 1993. A time integration algorithm for structural dynamics with improved numerical dissipation: the generalized- $\alpha$  method. *J. Appl. Mech.* 60:371–375.
56. Hagerman, P. J. 1988. Flexibility of DNA. *Annu. Rev. Biophys. Biophys. Chem.* 17:265–286.
57. Lillian, T. D., S. Goyal, ..., N. C. Perkins. 2008. Computational analysis of looping of a large family of highly bent DNA by LacI. *Biophys. J.* 95:5832–5842.
58. Manning, R. S., J. H. Maddocks, and J. D. Kahn. 1996. A continuum rod model of sequence-dependent DNA structure. *J. Chem. Phys.* 105:5626–5646.
59. Schlick, T. 1995. Modeling superhelical DNA: recent analytical and dynamic approaches. *Curr. Opin. Struct. Biol.* 5:245–262.
60. Spiriti, J., H. Kamberaj, ..., A. van der Vaart. 2012. DNA bending through large angles is aided by ionic screening. *J. Chem. Theory Comput.* 8:2145–2156.
61. Strick, T., J.-F. Allemand, ..., D. Bensimon. 2000. Twisting and stretching single DNA molecules. *Prog. Biophys. Mol. Biol.* 74:115–140.

# Supporting Material

## Structural Ensemble and Dynamics of Toroidal-like DNA Shapes in Bacteriophage $\phi$ 29 Exit Cavity

Andrew D. Hirsh<sup>1¶</sup>,  
Maryna Taranova<sup>2¶</sup>,  
Troy A. Lionberger<sup>3</sup>,  
Todd D. Lillian<sup>4</sup>,  
Ioan Andricioaei<sup>5</sup>  
and N. C. Perkins<sup>6</sup>

¶ These authors contributed equally to this work.

<sup>1</sup>Corresponding author. Mechanical Engineering, University of Michigan, Ann Arbor, MI

<sup>2</sup>Chemistry, University of California - Irvine, Irvine, CA

<sup>3</sup>Physics, University of California - Berkeley, Berkeley, CA

<sup>4</sup>Mechanical Engineering, Texas Tech University, Lubbock, TX

<sup>5</sup>Chemistry, University of California - Irvine, Irvine CA

<sup>6</sup>Mechanical Engineering, University of Michigan, Ann Arbor, MI.

**Sensitivity to L-J potential well depth,  $\epsilon$** 

To determine the optimal interaction strength between DNA and the cavity, we present simulations which vary the strength of the Lennard-Jones (L-J) interaction potential,  $\epsilon$ . Specifically, the system was equilibrated with five different values for the L-J potential depth ( $\epsilon = 0, 0.02, 0.2, 2, 20$  kcal/mol) following identical simulation protocol and monitoring the stability of the DNA double helix. In Fig. S1, denatured regions (as indicated by large H-bond distance) were observed in the case of very weak interaction ( $\epsilon = 0.02$  kcal/mol) and near complete DNA destruction was observed for extremely strong interaction ( $\epsilon = 20.0$  kcal/mol). Minor deviations from the double-stranded structure were observed when epsilon was set to 0.2 kcal/mol (see Fig. 6). This important observation supports the argument that the sharply bent DNA double helix in  $\phi$ 29 is sensitive to its environment. In the real system, the toroidal DNA motif inside the cavity is part of a complex interaction network of the phage's molecular components. For instance, sequence-specific DNA-protein interactions and long-range electrostatic interactions with the capsid proteins and capsid DNA might impact the structure of the toroidal DNA.

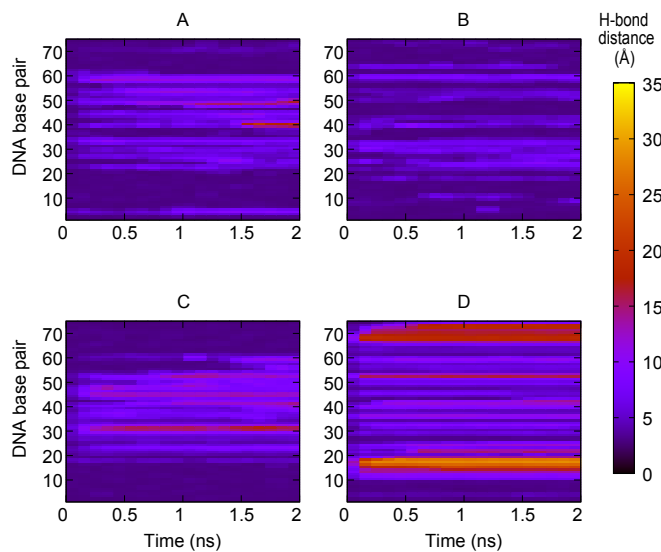

Figure S1: Time evolution of the Watson-Crick base pair hydrogen bond distances between complementary bases during simulation. The simulated DNA is 75 bp-long and contains the 33 bp-long toroidal motif. Each plot represents a simulation with different values of the Lennard-Jones parameter  $\epsilon$ : (A)  $\epsilon = 0.02$  kcal/mol, (B)  $\epsilon = 0.2$  kcal/mol, (C)  $\epsilon = 2$  kcal/mol, (D)  $\epsilon = 20$  kcal/mol. While some denatured regions (red colored regions) are observed in (A), severe denaturation (red and yellow colored regions) develops in (C) and (D). Plot (B) contains some regions, where Watson-Crick basepair hydrogen bond distances are slightly larger than 3 - 4 Å, but overall the structure does not exhibit any signature of denaturation.

**Table S1**

Release schedule of harmonic restraints

| $K_{RMSD}$<br>( $kcal/mol/\text{\AA}^2$ ) | $K_{D-A}$<br>( $kcal/mol/\text{\AA}^2$ ) | $K_{DNA\ ends}$<br>( $kcal/mol/\text{\AA}^2$ ) | time          |
|-------------------------------------------|------------------------------------------|------------------------------------------------|---------------|
| 100                                       | 100                                      | 100                                            | heating, 2 ns |
| 60                                        | 60                                       | 100                                            | 2 ns          |
| 30                                        | 30                                       | 100                                            | 2 ns          |
| 10                                        | 10                                       | 100                                            | 2 ns          |
| 0                                         | 0                                        | 100                                            | 2 ns          |

Table S1:  $K_{RMSD}$  is a force constant applied to DNA heavy atoms to restrain their Cartesian coordinates to those of the initial structure,  $K_{D-A}$  corresponds to a force constant used to restrain the donor-acceptor distances between complementary DNA bases,  $K_{DNA\ ends}$  is a force constant applied to restrain the motion of terminal DNA basepairs along the tail tube direction.

### Potential energy landscape for left-handed toroids

Currently it remains unknown whether the toroid is a right- or left-handed supercoil. While we believe the toroid is likely a right-handed helical supercoil, for completeness we include the 2-D energy landscape for left-handed toroids (see Fig. S2). As with right-handed toroids, the potential energy for left-handed toroids exhibits large regions of low energy (blue/magenta) interrupted by patches of slightly higher energy (yellow) which vary with toroid size and registry. While the location of these patches differs slightly from the right-handed landscape, the left-handed toroids remain essentially energetically equivalent suggesting no energetic preference between a right- or left-handed configuration. Given that the right- and left-handed landscapes remain energetically equivalent, it is reasonable to postulate that the reconstruction of (1) may reflect an averaged ensemble of both types.

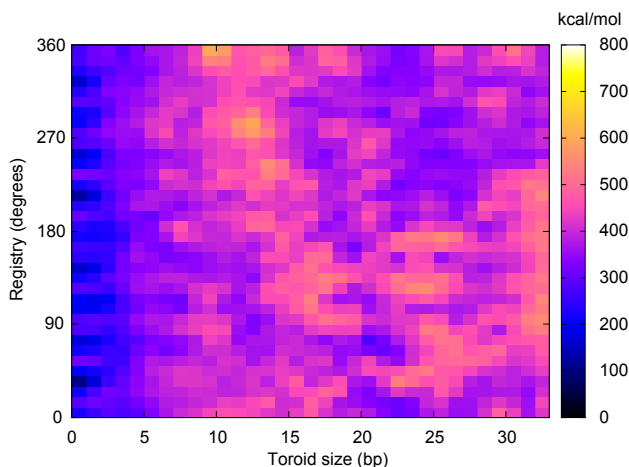

Figure S2: Potential energy landscape for left-handed toroids of varying size (basepairs) and registry value (degrees). As in the right-handed landscape, energy values are scaled to the minimum value in the corresponding landscape.

### Additional predicted density maps

We present additional predicted density maps to show how they change upon parametrically varying the registry for the right- and left-handed 33 bp toroid (Fig. S3A/B, respectively) which show slight changes in the size and shape of the central void but all possess toroid intensity which agrees with the experimental study (1).

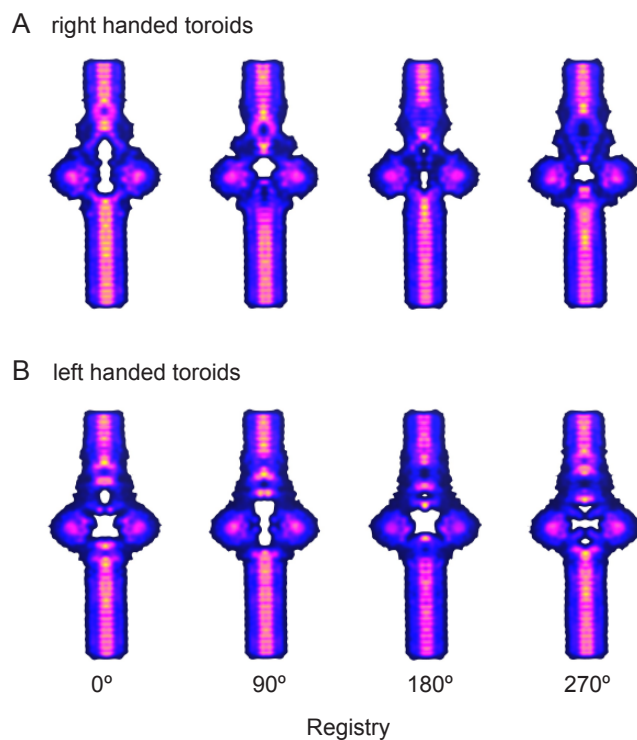

Figure S3: Predicted density maps upon parametrically varying registry value (degrees) for the (A) right-handed and (B) left-handed 33 bp toroid. Note minor changes in the shape of the central void and smaller holes as registry and handedness change.



## Review of the elastic rod model

We include a brief summary of the elasto-dynamic rod model so the reader can understand the fundamentals of our approach. We advise the interested reader to consult previous work for a complete development of the model (2–5). We now draw significantly from (5) which summarizes details from (2, 4).

The rod model is fundamentally a coarse-grain approximation for DNA which sacrifices atomic detail in favor of describing the long length/time scales necessary to capture the three-dimensional bending and twisting of the DNA helical axis. It is a numerical extension of (3D) elastica theory and captures geometrically large deformations/rotation of the cross section. The rod model incorporates elastic properties that have been determined by experiment, see for example, (6–8) and by molecular dynamics (MD) simulation (9, 10). The resolution of the rod model approach is approximately 1 helical turn of the DNA double helix, about 3.5 nm.

Figure 2C depicts the atomic structure of DNA superimposed with an elastic rod possessing equivalent averaged elastic properties. The helical axis of the molecule is parameterized by the centerline curve,  $\vec{R}(s, t)$ , and a cross sectional reference frame  $\{a_i(s, t)\}$  where the independent variables,  $s$  and  $t$ , denote contour length (as measured from one rod boundary) and time, respectively. The rod is also described by the curvature/twist vector  $\vec{\kappa}(s, t)$  which is defined as the spatial rotation rate of the body fixed frame  $\{a_i(s, t)\}$  (2).

The dynamical rod formulation begins with the Newton-Euler equations of motion for an infinitesimal rod segment. Deformations to the molecule result in a net internal force  $\vec{f}(s, t)$  and internal moment  $\vec{q}(s, t)$ . The dynamics of the rod are described by the translational velocity  $\vec{v}(s, t)$  and angular velocity  $\vec{\omega}(s, t)$  of the cross section. The kinetic and kinematic quantities are related through the following four vector equations of rod theory (2):

$$\frac{\partial \vec{f}}{\partial s} + \vec{\kappa} \times \vec{f} = m \left( \frac{\partial \vec{v}}{\partial t} + \vec{\omega} \times \vec{v} \right) - \vec{F}_{body}, \quad (1)$$

$$\frac{\partial \vec{q}}{\partial s} + \vec{\kappa} \times \vec{q} = \mathbf{I} \frac{\partial \vec{\omega}}{\partial t} + \vec{\omega} \times \mathbf{I} \vec{\omega} + \vec{f} \times \hat{t} - \vec{Q}_{body}, \quad (2)$$

$$\frac{\partial \vec{v}}{\partial s} + \vec{\kappa} \times \vec{v} = \vec{\omega} \times \hat{t}, \quad (3)$$

$$\frac{\partial \vec{\omega}}{\partial s} + \vec{\kappa} \times \vec{\omega} = \frac{\partial \vec{\kappa}}{\partial t}. \quad (4)$$

The partial differential equations are expressed in the body fixed frame  $\{a_i(s, t)\}$ . Equations (1) and (2) represent the balance laws for linear and angular momentum, respectively. Equation (3) represents a constraint on the (assumed) inextensibility and unshearability of the rod. Equation (4) is a constraint on the curvature/twist and angular velocity vectors that ensures continuity of the cross section orientation. In these equations,  $m(s)$  denotes the mass per unit contour length,  $\mathbf{I}(s)$  denotes the tensor of principal mass moments of inertia per unit contour length,  $\vec{F}_{body}(s, t)$  denotes any externally distributed body forces per unit contour length,  $\vec{Q}_{body}(s, t)$  denotes any externally distributed body moments per unit contour length, and  $\hat{t}(s, t)$  denotes the helical axis unit tangent vector. Additional physical interactions such as cavity contact and hydrodynamic drag will be incorporated into the governing equations through  $\vec{F}_{body}(s, t)$  and  $\vec{Q}_{body}(s, t)$ .

The inter-atomic interactions of a DNA molecule combine to yield an averaged long length scale linear-elastic stiffness based on the bending and torsional persistence length of DNA (see, for example (11–14)). The internal moment  $\vec{q}(s, t)$  results from the linear elastic constitutive law which relates the bending (50 nm·kT) and torsional stiffness (75 nm·kT) in a diagonal tensor,  $\mathbf{B}$ , to the local curvature  $\vec{\kappa}(s, t)$ . The constitutive law is

$$\vec{q}(s, t) = \mathbf{B}(s) (\vec{\kappa}(s, t) - \vec{\kappa}_o(s)). \quad (5)$$

The shape of an unstressed DNA molecule is not generally straight and depends on the basepair sequence. This intrinsic curvature is represented by  $\vec{\kappa}_o(s)$  and subsequent deformations from this unstressed state result in internal forces and moments. Although we have incorporated sequence-dependent intrinsic curvature in previous work (3, 15), herein we model DNA as an intrinsically straight, homogeneous, isotropic elastic rod. The stiffness properties result in the following elastic energy functional

$$E(t) = \int_0^L \frac{1}{2} [\{\vec{\kappa}(s, t)\}^T \mathbf{B} \{\vec{\kappa}(s, t)\}] ds, \quad (6)$$

where  $E(t)$  is the elastic strain energy in units of  $kT$ .

We are also interested in simulating the dynamic ejection of the toroid. Although the DNA is likely to experience a myriad of interactions with the

protein that hinder its motion as it passes through the tail tube, currently these interactions are unknown. Therefore we include an approximation to the large viscous forces that dominate the dynamics of DNA (also implemented in (4)). We obtain viscous drag coefficients following (16) which are proportional to the velocity and angular velocity of a straight rod. As in the cavity interaction forces, the viscous forces are yet another contribution to  $\vec{F}_{body}$  in Eq. 1. To approximate drag per unit length acting on DNA, we first calculate the total drag force acting on a straight rod (with identical contour length as DNA) in uniform flow and compute the drag per unit length. This drag force is assumed to be evenly distributed along the length of the straight rod. We then assume that the drag coefficients per unit length of the straight rod are equivalent to the drag coefficients per unit length of DNA. Following these approximations, we arrive at drag coefficients per unit length for velocities perpendicular ( $C_{\perp}$ ), parallel ( $C_{\parallel}$ , which acts along  $\hat{t}$ ), and rotations about the helical axis which are given by:

$$C_{\parallel} = \frac{2\pi\mu}{\ln\left(\frac{L}{2r_o}\right) - 0.2}, \quad (7)$$

$$C_{\perp} = \frac{4\pi\mu}{\ln\left(\frac{L}{2r_o}\right) + 0.84}, \quad (8)$$

$$C_{axial} = \pi\mu(2r_o)^2. \quad (9)$$

Here the contour length of the molecule  $L = 527 \text{ \AA}$  (155 bp),  $r_o = 10 \text{ \AA}$  is the radius of the molecule, and  $\mu = 1.3 \times 10^{-3} \text{ kg/(m}\cdot\text{s)}$  is the viscosity of water. The dissipation from these forces/moments enters into the governing equations through  $\vec{F}_{body}$  in Eq. (1) and  $\vec{Q}_{body}$  in Eq. (2). The drag force and torque (per unit length) are expressed in terms of the local  $\mathbf{a}$  fame in Fig. 2C as follows:

$$\vec{F}_{drag} = - \begin{bmatrix} C_{\perp} & 0 & 0 \\ 0 & C_{\perp} & 0 \\ 0 & 0 & C_{\parallel} \end{bmatrix} \vec{v} \quad (10)$$

$$\vec{Q}_{drag} = - \begin{bmatrix} 0 & 0 & 0 \\ 0 & 0 & 0 \\ 0 & 0 & C_{axial} \end{bmatrix} \vec{\omega}. \quad (11)$$

The partial differential field equations Eq. (1)-(4) are numerically integrated upon defining boundary conditions which correspond to physical loads or kinematic constraints (e.g. by protein binding (3, 15)). The equations are discretized using finite differencing and integrated using the generalized-alpha method in space and time (2, 17).

## References

1. Tang, J., N. Olson, P. J. Jardine, S. Girimes, D. L. Anderson, and T. S. Baker. 2008. DNA poised for release in bacteriophage  $\phi$ 29. *Structure*. 16:935–943.
2. Goyal, S., N. C. Perkins, and C. L. Lee. 2005. Nonlinear dynamics and loop formation in kirchhoff rods with implications to the mechanics of DNA and cables. *J. Comput. Phys.* 209:371–389.
3. Goyal, S., T. Lillian, S. Blumberg, J. -C. Meiners, E. Meyhöfer, and N. C. Perkins. 2007. Intrinsic curvature of DNA influences lacr-mediated looping. *Biophys. J.* 93:4342–4359.
4. Lillian, T. D., M. Taranova, J. Wereszczynski, I. Andricioaei, and N. C. Perkins. 2011. A multiscale dynamic model of DNA supercoil relaxation by topoisomerase IB. *Biophys. J.* 100:2016–2023.
5. Hirsh, A. D., T. D. Lillian, T. A. Lionberger, M. Taranova, I. Andricioaei, and N. C. Perkins. 2013. A model for highly strained DNA compressed inside a protein cavity. *J. Comput. Nonlin Dyn.* 8:031001.
6. Bryant, Z., M. Stone, J. Gore, S. Smith, N. Cozzarelli, and C. Bustamante. 2003. Structural transitions and elasticity from torque measurements on DNA. *Nature*. 424:338–341.
7. Strick, T., J.-F. Allemand, V. Croquette, and D. Bensimon. 2000. Twisting and stretching single DNA molecules. *Prog. Biophys. Mol. Bio.* 74:115–140.
8. Bustamante, C., Z. Bryant, and S. B. Smith. 2003. Ten years of tension: single-molecule DNA mechanics. *Nature*. 421:423–427.

9. Beveridge, D. L., M. A. Young, and D. Sprous. 1998. Modeling of DNA via molecular dynamics simulation: structure, bending, and conformational transitions. *In* *Acs. Sym. Ser.*, volume 682. 260–284.
10. Spiriti, J., H. Kamberaj, A. M. R. de Graff, M. F. Thorpe, and A. van der Vaart. 2012. DNA bending through large angles is aided by ionic screening. *J. Chem. Theory Comput.* 8:2145–2156.
11. Hagerman, P. J. 1988. Flexibility of DNA. *Annu. Rev. Biophys. Biophys. Chem.* 17:265–286.
12. Schlick, T. 1995. Modeling superhelical DNA: recent analytical and dynamic approaches. *Curr. Opin. Struct. Biol.* 5:245–262.
13. Manning, R. S., J. H. Maddocks, and J. D. Kahn. 1996. A continuum rod model of sequence-dependent DNA structure. *J. Chem. Phys.* 105:5626–5646.
14. Balaeff, A., L. Mahadevan, and K. Schulten. 2006. Modeling DNA loops using the theory of elasticity. *Phys. Rev. E Stat. Nonlin. Soft Matter Phys.* 73:031919.
15. Lillian, T. D., S. Goyal, J. D. Kahn, E. Meyhöfer, and N. C. Perkins. 2008. Computational analysis of looping of a large family of highly bent DNA by lacI. *Biophys. J.* 95:5832–5842.
16. Howard, J. 2001. *Mechanics of Motor Proteins and the Cytoskeleton*. Sinauer Associates, Sunderland, MA.
17. Chung, J. and G. M. Hulbert. 1993. A time integration algorithm for structural dynamics with improved numerical dissipation: the generalized- $\alpha$  method. *J. Appl. Mech.* 60:371–375.
